# Supplementary material for: Wheat Bran Polyphenols Ameliorate DSS-Induced Ulcerative Colitis in Mice by Suppressing MAPK/NF-κB Inflammasome Pathways and Regulating Intestinal Microbiota
Source: MDPI journal article supplement (doi:10.3390/foods13020225), 2024-01-10
Supplement: s1 [file s1]

## Supplementary materials

**Figure S1.** MS/MS spectra and fragmentation patterns of selected phenolic components.

**Table S1.** Disease activity index (DAI) scoring criteria.

**Table S2.** Primer sequence for quantitative PCR.

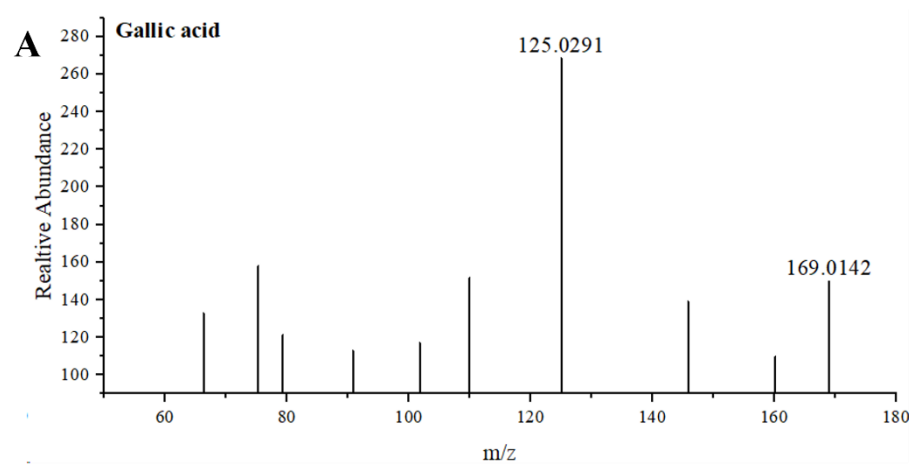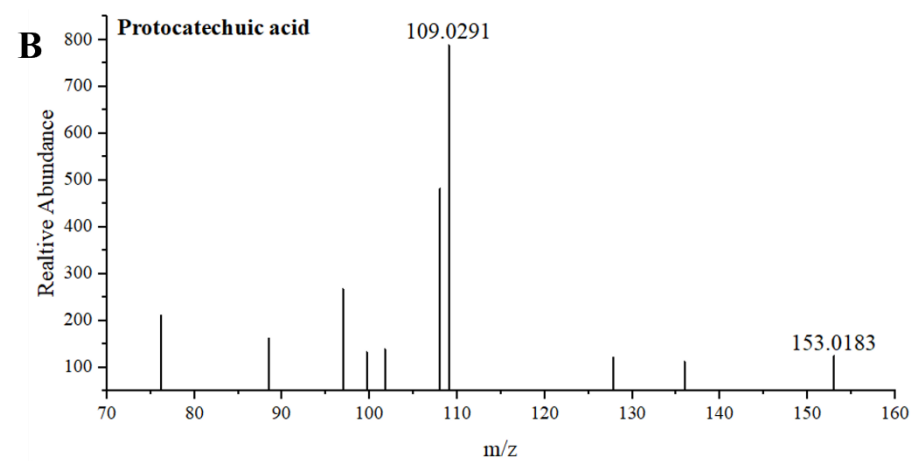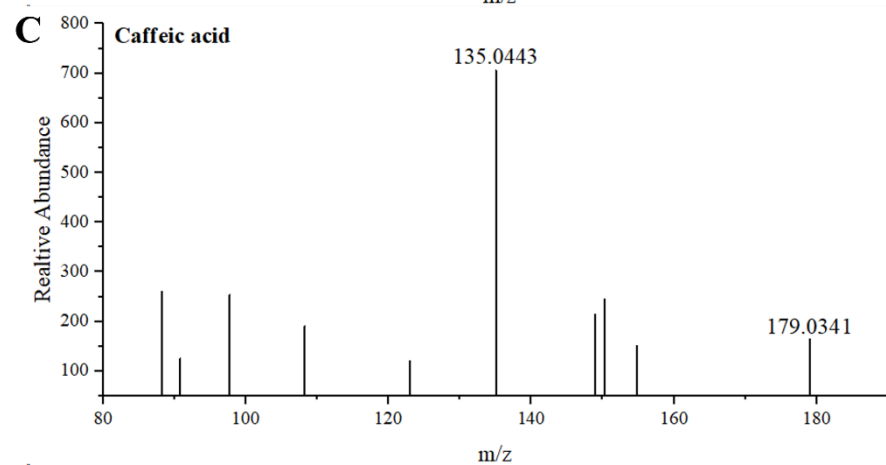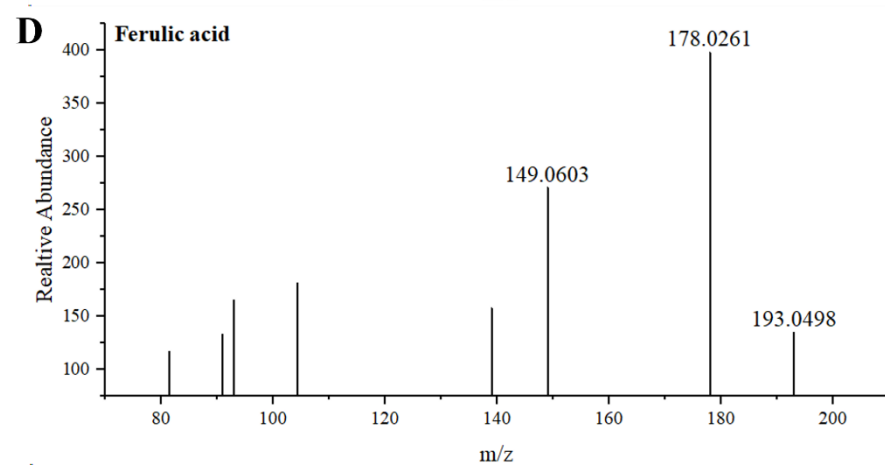

**Figure S1.** MS/MS spectra and fragmentation patterns of selected phenolic components. (A) Gallic acid; (B) Protocatechuic acid; (C) Caffeic acid; (D) Ferulic acid.

**Table S1.** Disease activity index (DAI) scoring criteria.

| <b>Body weight loss (%)</b> | <b>Stool consistency</b> | <b>Retal bleeding</b>               | <b>Activity states</b>       | <b>Score</b> |
|-----------------------------|--------------------------|-------------------------------------|------------------------------|--------------|
| No change                   | Normal                   | No observable blood                 | Normal                       | 0            |
| 1-5                         | Loose stool              | Small amount of blood in some stool | Some signs of poor condition | 1            |
| 5-10                        | Mild diarrhea            | Blood in stool regularly seen       | Moderately poor condition    | 2            |
| $\geq 10$                   | Diarrhea                 | Blood in all stool                  | Bad condition                | 3            |

**Table S2.** Primer sequence for quantitative PCR.

| Gene                              | Primer  | Sequence (5'-3')        |
|-----------------------------------|---------|-------------------------|
| $\beta$ -actin<br>(Mouse)         | Forward | ATGGAGCCGGACAGAAAAGC    |
|                                   | Reverse | TGGGAGGTGTCAACATCTTCTT  |
| ZO-1<br>(Mouse)                   | Forward | CCAGAGCCTCAGAAACCTCA    |
|                                   | Reverse | GCAGGAAGATGTGCAGAAGG    |
| Occludin<br>(Mouse)               | Forward | GCGGAAAGAGTTGACAGTCC    |
|                                   | Reverse | TGCCTGAAGTCATCCACACT    |
| Claudin-1<br>(Mouse)              | Forward | ACGGTCTTTGCACTTTGGTC    |
|                                   | Reverse | GGGAGAGGAGAAGCACAGTT    |
| I $\kappa$ B- $\alpha$<br>(Mouse) | Forward | TGAAGGACGAGGAGTACGAGC   |
|                                   | Reverse | TGCAGGAACGAGTCTCCGT     |
| NF- $\kappa$ B p65<br>(Mouse)     | Forward | TGTTCCAAAGAGCACCCAGG    |
|                                   | Reverse | TGCCAGGTCTGTGAACACTC    |
| ERK<br>(Mouse)                    | Forward | GGTTGTTCCCAAATGCTGACT   |
|                                   | Reverse | CAACTTCAATCCTCTTGTGAGGG |
| JNK<br>(Mouse)                    | Forward | GTGGAATCAAGCACCTTCACT   |
|                                   | Reverse | TCCTCGCCAGTCCAAAATCAA   |
| MAPK p38<br>(Mouse)               | Forward | TGACCCTTATGACCAGTCCTTT  |
|                                   | Reverse | GTCAGGCTCTTCCACTCATCTAT |
